# Supplementary material
Source: HighWire-hosted journal article supplement (https://bmjopenquality.bmj.com/content/6/2/e000055)
Supplement: inline-supplementary-material-1 [file inline-supplementary-material-1.docx]

**Supplement**


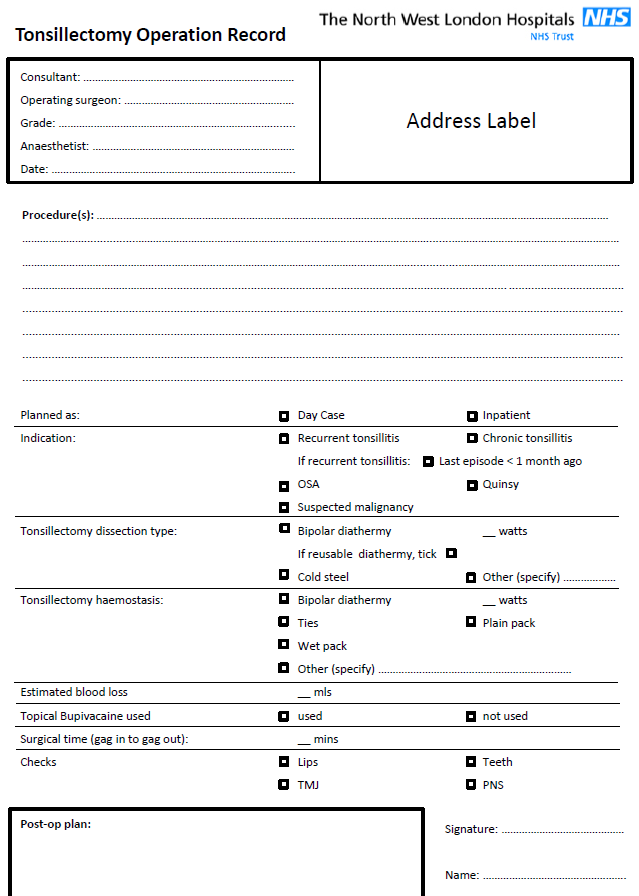


**Supplemental Figure 1 The paper proforma (based on [11]).**


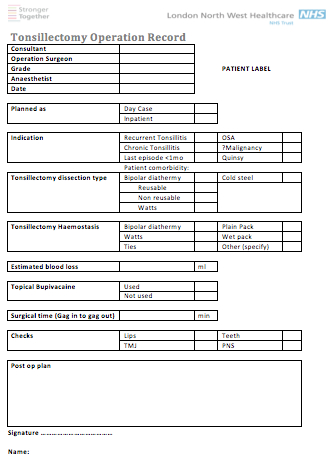


Supplementary Figure 2. The electronic proforma.
